# Supplementary material
Source: publisher site journal article supplement (https://www.dovepress.com/get_supplementary_file.php?f=297380.docx)
Supplement: Supplementary file 1 [file get_supplementary_file.php]

**Supplemental Table 1** Baseline Characteristic of Study Population

| Demographic characteristics | | Total  （n＝3249） | COPD | | P-value |
| --- | --- | --- | --- | --- | --- |
| Yes（n=394） | No（n=2855） |
| Age, year | | 52.8±9.4 | 56.9±9.1 | 52.3±9.3 | ＜0.001 |
| Sex | |  |  |  |  |
|  | Male | 1585（48.8%） | 234（59.4%） | 1351（47.3%） | ＜0.001 |
|  | Female | 1664（51.2%） | 160（40.6%） | 1504（52.7%） |
| BMI（kg/m2） | | 25.5±4.2 | 24.5±4.1 | 25.7±4.2 | ＜0.001 |
| Waist（cm） | | 92.9±11.4 | 91.8±11.9 | 93.1±11.3 | 0.038 |
| Education level | |  |  |  |  |
|  | illiterate | 432(13.3%) | 70（17.8%） | 362(12.7%) | 0.004 |
|  | Primary | 2340(72.0%) | 284(72.1%) | 2056(72.0%) |
|  | Secondary | 419(12.9%) | 34(8.6%) | 385(13.5%) |
|  | Higher | 58(1.8%) | 6(1.5%) | 52(1.8%) |
| Marital status | |  |  |  |  |
|  | married | 2781(85.6%) | 335（85.0%） | 2446（85.7%） | 0.731 |
|  | Divorce and so on | 468(14.4%) | 59（15.0%） | 409（14.3%） |
| Gross annual income (yuan) | |  |  |  |  |
|  | ＜10000 | 1783(45.1%) | 242(61.4%) | 1541(54.0%) | 0.005 |
|  | ≥10000 | 1466(54.9%) | 152(38.6%) | 1314(46.0%) |
| Type of medical insurance | |  |  |  |  |
|  | Rural cooperative medical care | 3181（97.9%） | 385（98.0%） | 2796（97.9%） | 0.777 |
|  | Self-funded  and so on | 68（2.1%） | 9（2.3%） | 59（2.1%） |
| Alcohol intake status | |  |  |  |  |
|  | Yes | 222（6.8%） | 21（5.3%） | 201（7.0%） | 0.207 |
|  | No | 3027（93.2%） | 373（94.7%） | 2654（93.0%） |
| D[rink tea](javascript:;) | |  |  |  |  |
|  | Yes | 1224（37.7%） | 140（35.5%） | 1084（38.0%） | 0.350 |
|  | No | 2025（62.3%） | 254（64.5%） | 1771（62.0%） |
| Fresh fruits | |  |  |  |  |
|  | [everyday](javascript:;) | 1706（62.5%） | 217（55.1%） | 1489（52.2%） | 0.713 |
|  | 4-6 times/week | 896（27.6%） | 100（25.4%） | 796（27.9%） |
|  | 1-3 times/week | 566（17.4%） | 65（16.5%） | 500（17.5%） |
|  | 1-3times/month | 66（2.0%） | 10（2.5%） | 56（2.0%） |
|  | never or rarely | 16（0.6%） | 2（0.5%） | 14（0.5%） |
| Barbecue | |  |  |  |  |
|  | Yes | 472（14.5%） | 71（18.0%） | 401（14.0%） | 0.036 |
|  | No | 2777（85.5%） | 323（82.0%） | 2454（86.0%） |
| Smoking | |  |  |  |  |
|  | Yes | 462（14.2%） | 74（18.8%） | 388（13.6%） | 0.006 |
|  | No | 2787（85.8%） | 320（81.2%） | 2467（86.4%） |
| Passive smoking | |  |  |  |  |
|  | Yes | 258（7.9%） | 44（11.2%） | 214（7.5%） | 0.012 |
|  | No | 2991（92.1%） | 350（88.8%） | 2641（92.5%） |
| Main source of energy | |  |  |  |  |
|  | Biomass or coal | 3104（95.5%%） | 387（98.2%） | 2717（95.2%） | 0.006 |
|  | Electricity or gas | 145（4.5%） | 7（1.8%） | 138（4.8%） |
| Ventilation system | |  |  |  |  |
|  | Yes | 561（17.3%） | 44（11.2%） | 517（18.1%） | 0.001 |
|  | No | 2688（82.7%） | 350（88.8%） | 2338（81.9%） |
| Stove | |  |  |  |  |
|  | Yes | 2985（91.9%） | 373（94.7%） | 2612（91.5%） | 0.030 |
|  | No | 264（8.1%） | 21（5.3%） | 243（8.5%） |
| Working strength | |  |  |  |  |
|  | Light-to-moderate activity | 1293（39.8%） | 175（44.4%） | 1118（39.2%） | 0.016 |
|  | Moderate or heavy activity | 1398（43.0%） | 143（36.3%） | 1255（44.0%） |
|  | Less activity | 558（17.2%） | 76（19.3%） | 482（16.9%） |
| Physical exercise | |  |  |  |  |
|  | Yes | 187（5.8%） | 27（6.9%） | 160（5.6%） | 0.319 |
|  | No | 3062（94.2%） | 367（93.1%） | 2695（94.4%） |
| Insomnia | |  |  |  |  |
|  | Yes | 2048(63.0%) | 241（61.2%） | 1807（63.3%） | 0.413 |
|  | No | 1201(36.9%) | 153（38..8%） | 1048（36.7%） |
| Tuberculosis | |  |  |  |  |
|  | Yes | 87（2.7%） | 19（4.8%） | 68（2.4%） | 0.005 |
|  | No | 3162（97.3%） | 375（95.2%） | 2787（97.6%） |
| Post-bronchodilator FEV1 (% predicted) | |  |  |  |  |
|  | <30 | 17(0.52%) | 6(1.5%) | 11(0.4%) | ＜0.001 |
|  | 30–49 | 101(3.1%) | 47(11.9%) | 54(1.9%) |
|  | 50–79 | 857(26.4%) | 224(56.9%) | 633(22.2%) |
|  | ≥80 | 2274(70.0%) | 117(29.7%) | 2157(75.6%) |

**Abbreviations:** FEV1, forced expiratory volume in 1 second; BMI, body mass index; COPD, chronic obstructive pulmonary disease.

**Notes:** Data are presented as mean ± SD or number (%). P-values <0.05, verses control. P-values are calculated by Student’s t-test, Mann–Whitney U test, or chi-squared test as appropriate.
